# Supplementary material
Source: PubMed Central journal article supplement (PMC4633785)
Supplement: CJN.02800315_CJN02800315SupplementaryData.pdf [file CJN.02800315_CJN02800315SupplementaryData.pdf]

**Table S1. Model-based estimates of unadjusted state-level probabilities of receiving nephrologist care at least 12 months before ESRD in the analyses for non-Hispanic patients only (N = 326,770)**

| Probability (%) of receiving nephrologist care <sup>a</sup> | Overall population  | Age <65 years       |                     | Age ≥65 years       |                     |
|-------------------------------------------------------------|---------------------|---------------------|---------------------|---------------------|---------------------|
|                                                             |                     | Black               | White               | Black <sup>b</sup>  | White               |
| Average of all states (95% CI)                              | 29.3<br>(25.7-33.1) | 24.4<br>(20.7-28.6) | 30.0<br>(26.7-33.6) | 29.3<br>(25.1-33.8) | 31.1<br>(28.1-34.4) |
| Variation in the state-level probabilities among states     |                     |                     |                     |                     |                     |
| Interval range containing 90% of the states                 | (19.0, 42.2)        | (14.7, 37.7)        | (20.2, 42.0)        | (17.3, 45.1)        | (21.3, 43.1)        |
| Length of the interval range                                | 23.2                | 23.0                | 21.8                | 27.8                | 21.8                |

<sup>a</sup> The estimated averages and variations were obtained from the null model without covariates (model 1) that was separately fit to the overall population and each of the four subpopulations.

<sup>b</sup> Seven states (Maine, Vermont, North Dakota, South Dakota, Montana, Wyoming, and Idaho) were excluded from the analysis because of fewer older non-Hispanic black patients in these states.
